# Supplementary material
Source: HighWire-hosted journal article supplement (https://spcare.bmj.com/highwire/filestream/154052/field_highwire_adjunct_files/1/spcare-2022-003996supp002_data_supplement.pdf)
Supplement: spcare-2022-003996supp002_data_supplement.pdf [file spcare-2022-003996supp002_data_supplement.pdf]

|                                | <b>Total population (N=20)</b> | <b>Standard Cancer Care (n=11)</b> | <b>Standard Cancer Care Plus Palliative Care (n=9)</b> |
|--------------------------------|--------------------------------|------------------------------------|--------------------------------------------------------|
| <b>Days Hospitalized</b>       | 18.8                           | 22.2                               | 14.7                                                   |
| <b>Cycles Chemo</b>            | 4.2                            | 6.4                                | 3                                                      |
| <b>Fractions Radiotherapy</b>  | 7.5                            | 8.6                                | 6.2                                                    |
| <b>Surgery</b>                 | 0.9                            | 0.9                                | 0.85                                                   |
| <b>MRI</b>                     | 0.7                            | 0.6                                | 0.75                                                   |
| <b>CT</b>                      | 2.2                            | 2.2                                | 2.1                                                    |
| <b>OPD visits</b>              | 18.3                           | 19.4                               | 17.1                                                   |
| <b>Total Hospital Costs*</b>   | 40,430/979.70                  | 53,588/1330.5                      | 24,349/604.6                                           |
| <b>Out of pocket payments*</b> | 5810/140.8                     | 7,768/192.8                        | 4,271/106.1                                            |
| <b>Lost wages*</b>             | 74,900/1814.9                  | 120,591/2994.2                     | 36,238/899.7                                           |
| <b>Palliative Care Costs*</b>  | 765.5/19.1                     | N/A                                | 765.5/19.1                                             |
| <b>Waiver holder</b>           | 9(45%)                         | 5(50%)                             | 4(44%)                                                 |

|                                            |          |           |          |
|--------------------------------------------|----------|-----------|----------|
| <b>Stage III or IV disease (Number, %)</b> | 18 (90%) | 11 (100%) | 7(77.8%) |
| <b>Alive at study end</b>                  | 10 (50%) | 7 (64%)   | 3 (33%)  |
